# Supplementary material for: Hospital Practice of Direct‐Home Discharge and 30‐Day Readmission After Transcatheter Aortic Valve Replacement in the Society of Thoracic Surgeons/American College of Cardiology Transcatheter Valve Therapy (STS/ACC TVT) Registry
Source: PubMed Central journal article supplement — J Am Heart Assoc. 2017 Aug 21;6(8):e006127. doi: 10.1161/JAHA.117.006127 (PMC5586454; doi:10.1161/jaha.117.006127), 2017-08-21
Supplement: JAH3-6-e006127-s001.pdf [file JAH3-6-e006127-s001.pdf]

# **SUPPLEMENTAL MATERIAL**

---

**Table S1. Model elements**

---

---

**Patient characteristics**

Age

Sex

Race (White vs. Non-White)

Ethnicity (Hispanic vs. Non-Hispanic)

Dual eligible insurance (Medicare/Medicaid)

Coronary artery disease

Heart failure within prior 2 weeks

New York Heart Association Class III or IV

Atrial fibrillation or flutter

Prior stroke

Prior cardiac surgery

Diabetes

Peripheral arterial disease

Chronic lung disease (moderate or severe)

Impaired renal function

GFR <30 vs. GFR >30\*

GFR on dialysis vs. ≥30

**Treatment Characteristics**

Cardiogenic shock within 24 hours

LVEF (%)

Mitral insufficiency (moderate or severe)

Non-femoral access (%)

General anesthesia (%)

Acuity category:

Elective

---

**Table S1. Model elements**

---

Urgent

Shock/inotropes/assist device

Emergent/salvage/cardiac arrest

Procedure date

In-hospital stroke or transient ischemic attack

In-hospital cardiac arrest

In-hospital vascular access complication

In-hospital aortic dissection

In-hospital unplanned cardiac surgery or intervention

RBC/whole blood transfusion

Number of hours in ICU

**Hospital Characteristics**

Number of hospital beds

Region:

Northeast

West

Midwest

South

Teaching hospital

Annual TAVR volume

---

\*GFR = glomerular filtration rate
